# Supplementary material for: Aflatoxin B1–Formamidopyrimidine DNA Adducts: Relationships between Structures, Free Energies, and Melting Temperatures
Source: MDPI journal article supplement (doi:10.3390/molecules24010150), 2019-01-02

# Supplementary Materials: Aflatoxin B<sub>1</sub>–Formamido-pyrimidine DNA Adducts: Relationships between Structures, Free Energies, and Melting Temperatures

Martin Klvana  and Urban Bren

**Table S1.** Contributions of the probes (*g*, *a*, or *b*) to the absolute free energy of dsDNA formation (kcal/mol).<sup>a</sup>

|                   | $\Delta G_{\text{vdw1}}$ | $\Delta G_{\text{ele1}}$ | $\Delta G_{\text{ele2}}$ | $\Delta G_{\text{ele}}$ | $\Delta G$           |
|-------------------|--------------------------|--------------------------|--------------------------|-------------------------|----------------------|
| DNA <sub>1g</sub> | −1.2 (0.2, 0.4, 0.8)     | −2.4 (0.5, 0.4, 0.9)     | −0.7 (0.3, 0.3, 0.6)     | −3.1 (0.7, 0.6, 1.5)    | −4.3 (0.7, 0.4, 0.8) |
| DNA <sub>1a</sub> | −3.5 (0.5, 0.2, 0.5)     | 0.9 (1.1, 2.6, 6.0)      | −0.0 (0.6, 1.5, 3.7)     | 0.9 (1.2, 3.6, 8.1)     | −2.6 (1.4, 3.5, 7.9) |
| DNA <sub>1b</sub> | −2.8 (0.3, 0.3, 0.7)     | −1.8 (1.4, 2.4, 5.6)     | −1.7 (0.8, 1.0, 2.1)     | −3.6 (2.0, 2.8, 5.7)    | −6.3 (1.9, 2.5, 5.2) |
| DNA <sub>2g</sub> | −0.9 (0.3, 0.2, 0.5)     | −2.9 (0.7, 0.4, 0.9)     | −0.1 (1.3, 1.1, 2.6)     | −3.1 (1.5, 1.0, 2.3)    | −3.9 (1.4, 1.0, 2.4) |
| DNA <sub>2a</sub> | −2.4 (0.4, 0.4, 0.9)     | −1.9 (1.0, 1.3, 2.4)     | 1.4 (2.2, 1.2, 2.7)      | −0.5 (3.2, 2.1, 5.1)    | −2.9 (3.6, 2.4, 5.4) |
| DNA <sub>2b</sub> | −3.2 (0.6, 0.5, 1.2)     | −1.0 (1.5, 1.7, 4.0)     | −0.6 (0.8, 1.2, 2.6)     | −1.6 (2.0, 1.9, 4.4)    | −4.8 (1.6, 1.5, 3.6) |
| DNA <sub>g</sub>  | −1.0 (0.2, 0.3, 0.6)     | −2.7 (0.4, 0.4, 0.9)     | −0.4 (0.8, 0.5, 1.0)     | −3.1 (0.9, 0.6, 1.4)    | −4.1 (0.8, 0.4, 0.8) |
| DNA <sub>a</sub>  | −2.9 (0.3, 0.3, 0.7)     | −0.5 (1.1, 1.3, 3.1)     | 0.7 (1.1, 1.2, 2.3)      | 0.2 (2.0, 2.0, 4.8)     | −2.8 (2.2, 2.0, 4.4) |
| DNA <sub>b</sub>  | −3.0 (0.4, 0.3, 0.7)     | −1.4 (1.5, 1.7, 3.9)     | −1.2 (0.7, 1.0, 2.4)     | −2.6 (2.0, 1.5, 3.4)    | −5.6 (1.8, 1.3, 3.0) |

<sup>a</sup>vdw, van der Waals; ele, electrostatic;  $\Delta G_{\text{vdw1}} = \Delta G_{\text{vdw1,dsDNA}} - \Delta G_{\text{vdw1,ssDNA}}$ ;  $\Delta G_{\text{ele1}} = \Delta G_{\text{ele1,dsDNA}} - \Delta G_{\text{ele1,ssDNA}}$ ;  $\Delta G_{\text{ele2}} = \Delta G_{\text{ele2,dsDNA}} - \Delta G_{\text{ele2,ssDNA}}$ ;  $\Delta G_{\text{ele}} = \Delta G_{\text{ele1}} + \Delta G_{\text{ele2}}$ ;  $\Delta G = \Delta G_{\text{vdw1}} + \Delta G_{\text{ele}}$ ; DNA = 0.5(DNA<sub>1</sub> + DNA<sub>2</sub>); free energy (convergence, standard deviation, spread).

**Table S2.** Atom types and partial atomic charges of the Gua probe.<sup>a</sup>

| ID | name | type  | charge  | ID | name | type | charge  |
|----|------|-------|---------|----|------|------|---------|
| 13 | N9   | Nstar | 0.0577  | 21 | H1   | H    | 0.3520  |
| 14 | C8   | CK    | 0.0736  | 22 | C2   | CA   | 0.7432  |
| 15 | H8   | H5    | 0.1997  | 23 | N2   | N2   | −0.9230 |
| 16 | N7   | NB    | −0.5725 | 24 | H21  | H    | 0.4235  |
| 17 | C5   | CB    | 0.1991  | 25 | H22  | H    | 0.4235  |
| 18 | C6   | C     | 0.4918  | 26 | N3   | NC   | −0.6636 |
| 19 | O6   | O     | −0.5699 | 27 | C4   | CB   | 0.1814  |
| 20 | N1   | NA    | −0.5053 |    |      |      |         |

<sup>a</sup>See Figure S1 for the assignment of atom identifiers.

**Table S3.** Atom types and partial atomic charges of the  $\alpha$ - and  $\beta$ -FAPy-N7-9-hydroxy-AFB<sub>1</sub> probes.<sup>a</sup>

| ID | name | type | charge  | ID | name | type | charge  |
|----|------|------|---------|----|------|------|---------|
| 13 | N13  | N2   | −0.3058 | 40 | O40  | OS   | −0.2550 |
| 14 | H14  | H    | 0.2923  | 41 | C41  | C    | 0.6236  |
| 15 | C15  | CM   | 0.2157  | 42 | O42  | O    | −0.5040 |
| 16 | N16  | NC   | −0.5696 | 43 | C43  | CB   | −0.1562 |
| 17 | C17  | CA   | 0.6487  | 44 | C44  | C    | 0.5077  |
| 18 | N18  | N2   | −0.9042 | 45 | O45  | O    | −0.5126 |
| 19 | H19  | H    | 0.4068  | 46 | C46  | CT   | −0.2010 |
| 20 | H20  | H    | 0.4068  | 47 | H47  | HC   | 0.0883  |
| 21 | N21  | NA   | −0.3703 | 48 | H48  | HC   | 0.0883  |
| 22 | H22  | H    | 0.3250  | 49 | C49  | CT   | −0.0333 |
| 23 | C23  | C    | 0.3519  | 50 | H50  | HC   | 0.0587  |
| 24 | O24  | O    | −0.5406 | 51 | H51  | HC   | 0.0587  |
| 25 | C25  | CM   | 0.1326  | 52 | C52  | CB   | 0.0349  |
| 26 | N26  | N    | −0.0720 | 53 | C53  | CA   | −0.0326 |
| 27 | C27  | C    | 0.3594  | 54 | C54  | CA   | 0.0493  |
| 28 | H28  | H5   | 0.0662  | 55 | O55  | OS   | −0.1767 |
| 29 | O29  | O    | −0.5229 | 56 | C56  | CT   | −0.0784 |
| 30 | C30  | CT   | 0.0468  | 57 | H57  | H1   | 0.0878  |
| 31 | H31  | H2   | 0.1424  | 58 | H58  | H1   | 0.0878  |
| 32 | C32  | CT   | 0.1831  | 59 | H59  | H1   | 0.0878  |
| 33 | H33  | H1   | 0.0786  | 60 | C60  | CA   | −0.1003 |
| 34 | O34  | OH   | −0.6592 | 61 | H61  | HA   | 0.1486  |
| 35 | H35  | HO   | 0.4221  | 62 | C62  | CB   | 0.0546  |
| 36 | C36  | CT   | 0.0502  | 63 | O63  | OS   | −0.3414 |
| 37 | H37  | HC   | 0.0426  | 64 | C64  | CT   | 0.4616  |
| 38 | C38  | CB   | −0.1040 | 65 | H65  | H2   | 0.0488  |
| 39 | C39  | CA   | 0.1299  | 66 | O66  | OS   | −0.4363 |

<sup>a</sup>See Figure S1 for the assignment of atom identifiers.**Table S4.** Parameters of 12-stage equilibrating molecular dynamics (EMD) simulations.

| parameter           | 1              | 2     | 3     | 4     | 5     | 6     | 7     | 8     | 9     | 10    | 11    | 12    |
|---------------------|----------------|-------|-------|-------|-------|-------|-------|-------|-------|-------|-------|-------|
| <i>MD</i>           |                |       |       |       |       |       |       |       |       |       |       |       |
| steps               | 10000          | 10000 | 10000 | 10000 | 20000 | 20000 | 20000 | 10000 | 10000 | 10000 | 20000 | 50000 |
| stepsize            | 0.01           | 0.04  | 0.1   | 0.3   | 0.5   | 0.5   | 0.5   | 1.0   | 1.0   | 1.0   | 1.0   | 2.0   |
| initial temperature | 5.0            |       |       |       |       |       |       |       |       |       |       |       |
| temperature         | 5.0            | 5.0   | 5.0   | 5.0   | 5.0   | 5.0   | 50.0  | 150.0 | 200.0 | 250.0 | 298.0 | 298.0 |
| bath coupling       | 0.1            | 0.4   | 1.0   | 3.0   | 40.0  | 40.0  | 40.0  | 40.0  | 40.0  | 40.0  | 40.0  | 40.0  |
| random seed         | S <sup>a</sup> |       |       |       |       |       |       |       |       |       |       |       |
| shake solute        | off            | off   | off   | off   | off   | off   | off   | off   | off   | off   | off   | off   |
| shake solvent       | off            | off   | off   | off   | off   | off   | off   | off   | off   | off   | on    | on    |
| shake hydrogens     | off            | off   | off   | off   | off   | off   | off   | off   | off   | off   | on    | on    |
| lrf                 | on             | on    | on    | on    | on    | on    | on    | on    | on    | on    | on    | on    |
| <i>cut-offs</i>     |                |       |       |       |       |       |       |       |       |       |       |       |
| solute-solute       | 10.0           | 10.0  | 10.0  | 10.0  | 10.0  | 10.0  | 10.0  | 10.0  | 10.0  | 10.0  | 10.0  | 10.0  |
| solvent-solvent     | 10.0           | 10.0  | 10.0  | 10.0  | 10.0  | 10.0  | 10.0  | 10.0  | 10.0  | 10.0  | 10.0  | 10.0  |
| solute-solvent      | 10.0           | 10.0  | 10.0  | 10.0  | 10.0  | 10.0  | 10.0  | 10.0  | 10.0  | 10.0  | 10.0  | 10.0  |
| q-atom              | 99.0           | 99.0  | 99.0  | 99.0  | 99.0  | 99.0  | 99.0  | 99.0  | 99.0  | 99.0  | 99.0  | 99.0  |
| lrf                 | 99.0           | 99.0  | 99.0  | 99.0  | 99.0  | 99.0  | 99.0  | 99.0  | 99.0  | 99.0  | 99.0  | 99.0  |
| <i>sphere</i>       |                |       |       |       |       |       |       |       |       |       |       |       |
| shell force         | 10.0           | 10.0  | 10.0  | 10.0  | 10.0  | 10.0  | 10.0  | 10.0  | 10.0  | 10.0  | 10.0  | 10.0  |
| shell radius        | 21.0           | 21.0  | 21.0  | 21.0  | 21.0  | 21.0  | 21.0  | 21.0  | 21.0  | 21.0  | 21.0  | 21.0  |
| exclude bonded      | off            | off   | off   | off   | off   | off   | off   | off   | off   | off   | off   | off   |
| <i>solvent</i>      |                |       |       |       |       |       |       |       |       |       |       |       |
| polarisation        | on             | on    | on    | on    | on    | on    | on    | on    | on    | on    | on    | on    |
| charge correction   | on             | on    | on    | on    | on    | on    | on    | on    | on    | on    | on    | on    |
| polarisation force  | 20.0           | 20.0  | 20.0  | 20.0  | 20.0  | 20.0  | 20.0  | 20.0  | 20.0  | 20.0  | 20.0  | 20.0  |
| <i>intervals</i>    |                |       |       |       |       |       |       |       |       |       |       |       |
| non bond            | 10             | 10    | 10    | 10    | 10    | 10    | 10    | 10    | 10    | 10    | 10    | 10    |
| output              | 500            | 500   | 500   | 500   | 500   | 500   | 500   | 500   | 500   | 500   | 500   | 500   |
| temperature         | 10             | 10    | 10    | 10    | 10    | 10    | 10    | 10    | 10    | 10    | 10    | 10    |
| energy              | 0              | 0     | 0     | 0     | 0     | 0     | 0     | 0     | 0     | 0     | 0     | 0     |
| trajectory          | 500            | 500   | 500   | 500   | 500   | 500   | 500   | 500   | 500   | 500   | 500   | 500   |
| volume change       | 0              | 0     | 0     | 0     | 0     | 0     | 0     | 0     | 0     | 0     | 0     | 0     |

<sup>a</sup>S: 1111 (EMD set ID 1), 2222 (EMD set ID 2), 3333 (EMD set ID 3), or 4444 (EMD set ID 4).

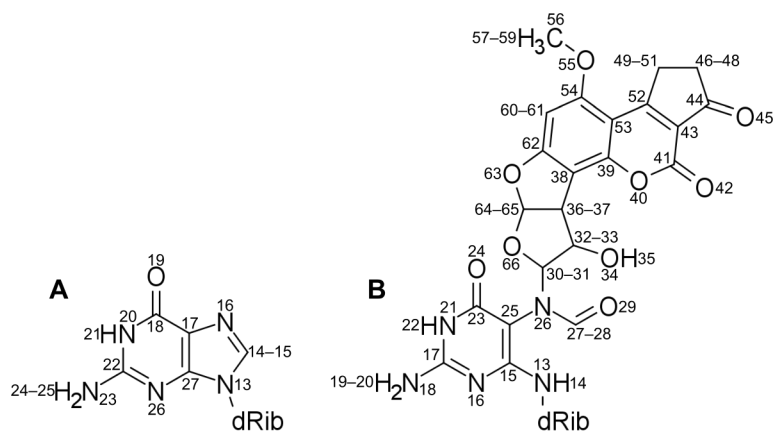

Supplement: s1 [file s1]
